# Supplementary material
Source: PubMed Central journal article supplement (PMC7954090)
Supplement: NIHMS1648061-supplement-1.pdf [file NIHMS1648061-supplement-1.pdf]

**Supplementary Table 1. a. BOLD protocol comparison**

| <b>BOLD MRI</b>             | <b>Recommendation</b>                                                              | <b>agree with consensus*</b>               |
|-----------------------------|------------------------------------------------------------------------------------|--------------------------------------------|
| Preparation                 | normal hydration (100 ml water), 4 h fasting from food                             | yes                                        |
| Field strength              | 1.5 T or 3.0 T, 3T preferred if available                                          | yes                                        |
| Sequence                    | 2D mGRE                                                                            | yes                                        |
| Orientation                 | coronal oblique to kidneys                                                         | yes                                        |
| In-plane resolution         | 2–3 mm                                                                             | yes                                        |
| Slice thickness             | 3–5 mm                                                                             | yes                                        |
| Coverage                    | 3–5 slices centered on renal hilum                                                 | yes                                        |
| Parallel imaging factor     | 2                                                                                  | not used                                   |
| Fat suppression             | yes                                                                                | yes                                        |
| TR (ms)                     | 60–75 ms                                                                           | yes                                        |
| TE (ms)                     | 8–16 echoes, up to 50 ms (~T2* cortex) at 3T with choice of in phase for fat-water | the longest TE<50ms, TEs were not in-phase |
| Averages                    | 1                                                                                  | yes                                        |
| Breathing mode              | breath hold                                                                        | yes                                        |
| Image quality control       | recommended                                                                        | yes                                        |
| ROI placement               | manual                                                                             | yes                                        |
| Cortical ROI                | 1 stripe/slice; > 3 slices                                                         | yes                                        |
| Medullary ROI               | 3 samples/slice; > 3 slices                                                        | yes                                        |
| Fitting                     | monoexponential or log-linear                                                      | yes                                        |
| Reporting                   | cortex and medulla                                                                 | yes                                        |
| Reported metric             | $R2^*$ (s <sup>-1</sup> )                                                          | yes                                        |
| Metric statistics reporting | mean, median, standard deviation, ROI size                                         | yes                                        |
| Map format                  | color or grayscale quantitative map                                                | yes                                        |

\*Consensus-based technical recommendations for clinical translation of renal BOLD MRI. MAGMA. 2020. 33:199-215. Note: only items related to our protocol were compared.

**Supplementary Table 1. b. DWI protocol comparison**

| <b>DWI MRI</b>              | <b>Recommendations</b>                                                | <b>agree with consensus*</b>                   |
|-----------------------------|-----------------------------------------------------------------------|------------------------------------------------|
| Preparation                 | normal hydration                                                      | yes                                            |
| Field strength              | 1.5 T or 3.0 T                                                        | yes                                            |
| Sequence                    | single shot EPI                                                       | yes                                            |
| Orientation                 | oblique coronal                                                       | yes                                            |
| Matrix                      | >128                                                                  | yes                                            |
| In-plane resolution         | 2-3 mm                                                                | yes                                            |
| Slice thickness             | >4 mm                                                                 | yes                                            |
| Coverage                    | full kidney                                                           | 5 slices centered on renal hilum               |
| Parallel imaging factor     | 2                                                                     | yes                                            |
| Fat suppression             | SPAIR                                                                 | yes                                            |
| TR (s)                      | 4                                                                     | TR=3s                                          |
| TE (ms)                     | min ( < 100)                                                          | yes                                            |
| Averages                    | 3                                                                     | yes                                            |
| Breathing mode              | respiratory gated (or free breathing with post-hoc motion correction) | free breathing (no post-hoc correction)        |
| Cardiac gating              | no                                                                    | yes                                            |
| Diffusion gradients         | monopolar                                                             | bipolar                                        |
| # b-values                  | 4                                                                     | yes                                            |
| Suggested b-values          | 0, 100, 200, 800                                                      | used different combination                     |
| # directions                | 3                                                                     | yes                                            |
| Time (min)                  | 2                                                                     | <4 min                                         |
| Distortion correction       | recommended                                                           | yes                                            |
| Registration                | recommended, unilateral if possible                                   | yes                                            |
| Image quality control       | recommended                                                           | yes                                            |
| ROI placement               | b=0 image                                                             | placed on ADC map directly                     |
| Cortical ROI                | 1 stripe / slice; > 3 slices                                          | yes                                            |
| Medullary ROI               | 3 samples / slice; > 3 slices                                         | yes                                            |
| Reporting                   | cortex and Medulla                                                    | Only report cortex because limited differences |
| Metric statistics reporting | mean, Median, Standard deviation, ROI size                            | yes                                            |
| Diffusion units             | 10 <sup>-3</sup> mm <sup>2</sup> / s                                  | 10 <sup>-6</sup> mm <sup>2</sup> /s            |
| Map format                  | colormap, fused with anatomy if possible                              | grayscale map                                  |

\*Consensus-based technical recommendations for clinical translation of renal diffusion-weighted MRI. MAGMA. 2020. 33:177–195. Note: only items related to our protocol were compared.

**Supplementary Table 1. c. ASL protocol comparison**

| <b>ASL MRI</b>                           | <b>Recommendations</b>                                                                              | <b>agree with consensus*</b>      |
|------------------------------------------|-----------------------------------------------------------------------------------------------------|-----------------------------------|
| 1. Patient preparation                   | normal hydration                                                                                    | yes                               |
| 2.1 field strengths                      | 1.5 T and 3 T                                                                                       | yes                               |
| 2.2 transmitter coil                     | body coil                                                                                           | yes                               |
| 2.3 receive coils                        | body phased-array coils                                                                             | yes                               |
| 3. Labeling strategy                     | both PASL:FAIR and PCASL                                                                            | yes                               |
| 3.2 time point acquisitions              | single time point acquisitions                                                                      | yes                               |
| 4. FAIR labeling parameters              | FAIR labeling parameters                                                                            | yes                               |
| 4.1 optimize the inversion slice profile | FOCI pulse should be used                                                                           | yes                               |
| 4.2 selective slab                       | carefully positioned, excluding the aorta                                                           | yes                               |
| 4.3 selective inversion slab thickness   | should equal to the imaging slab thickness                                                          | yes                               |
| 4.4 single-TI acquisitions               | an inversion time of 1.8–2.0 s                                                                      | yes                               |
| 4.7 ASL pairs in single-TI acquisition   | minimum of 20 ASL pairs                                                                             | yes                               |
| 6.4 readout sequence                     | 2D single-slice acquisition scheme, SE-EPI, bSSFP and single-shot RARE                              | True FISP                         |
| 6.7 Orientation                          | coronal oblique slices (along the major axis of the kidneys)                                        | yes                               |
| 6.8 slice thickness                      | 2D acquisitions is 4-8 mm                                                                           | yes                               |
| 6.10 in-plane resolution                 | 2-4 mm                                                                                              | yes                               |
| 6.11 Undersampling methods               | partial Fourier and parallel imaging at moderate acceleration factors (up to R=2) may be used       | standard partial Fourier; no IPAT |
| 6.12 TR (including labeling + readout)   | 4–6s                                                                                                | yes                               |
| 7.1 Pre and post-inversion saturations   | Recommended for FAIR labeling schemes                                                               | not used                          |
| 7.2 Background-suppression               | recommended                                                                                         | not used                          |
| 7.3 Breath-hold scans                    | not recommended                                                                                     | yes                               |
| 7.4 free breathing scan                  | preferred                                                                                           | yes                               |
| 7.5 Respiratory triggering               | minimize the effects of kidney motion at the expense of scan                                        | not used                          |
| 7.6 Fat suppression                      | recommended for renal ASL                                                                           | yes                               |
| 8.1 Retrospective image registration     | highly recommended                                                                                  | yes                               |
| 8.2 Outlier rejection                    | recommended                                                                                         | yes                               |
| 9.1 M0 acquisition                       | mandatory                                                                                           | yes                               |
| 9.2 compartment model                    | single-compartment model with assumed blood T1                                                      | yes                               |
| 9.4 Tissue-blood partition coefficient   | 0.9 mL/g                                                                                            | 80mL/100mg                        |
| 9.5 Assumed blood T1                     | at 3 T = 1.65 s                                                                                     | 1.15 s                            |
| 9.7 Labeling efficiency PASL             | PASL = 95% (neglecting background suppression loss)                                                 | yes                               |
| 9.10 Regions of interest selection       | should be performed manually on the ASL M0 image                                                    | manually on perfusion map         |
| 10. Data analysis/reporting              | cortical renal blood flow values, not medulla or whole-kidney, separately for left and right kidney | yes                               |

\*Consensus-based technical recommendations for clinical translation of renal ASL MRI. MAGMA. 2020. 33:141–161. Note: only items related to our protocol were compared.
